# Supplementary material
Source: ML conference proceedings conference paper supplement (https://openaccess.thecvf.com/content/ACCV2022/html/Lee_Rethinking_Online_Knowledge_ACCV_2022_paper.html)
Supplement: Supplementary file 1 [file Lee_Rethinking_Online_Knowledge_ACCV_2022_supplemental.pdf]

# Rethinking Online Knowledge Distillation with Multi-Exits

Hojung Lee<sup>[0000-0001-9312-3904]</sup> and Jong-Seok Lee<sup>[0000-0002-8038-1119]</sup>

School of Integrated Technology, Yonsei University, Incheon 21983, South Korea  
{hjlee92, jong-seok.lee}@yonsei.ac.kr

## A Supplementary Material

We provide the implementation details including the structures of the networks and the training hyperparameters used for the experiments. In addition, we provide additional experimental results that are not included in the paper due to lack of space. Code is available at <https://github.com/hjdw2/BEED>.

### A.1 Network

The network architectures for CIFAR-100 are described in Figure 1. For ResNet [1], we modify the first convolution layer: kernel size ( $7 \times 7 \rightarrow 3 \times 3$ ), stride ( $2 \rightarrow 1$ ), and padding ( $3 \rightarrow 1$ ). In addition, we remove the max-pooling operation as in [3]. For WideResNet (WRN) [8], we do not use the dropout operation. For ResNet and WRN, the numbers of channels in the convolutional layers in the exits is the same as the numbers of channels of the corresponding residual blocks in the main network. For MobileNet-V2 [6] and EfficientNetB0 [7], the numbers of channels in the convolutional layers in the exits is the numbers of channels of the input feature multiplied by the channel expansion. However, the numbers of channels in the last convolutional layers in the exits is the same as the numbers of channels of the last convolution layer in the main network in order to match the feature dimension for feature distillation. For MSDNet [2], we set the number of total exits to four and other implementation details are the same as in the original work. For ImageNet, there is no modification in the main network and we use the same exits used for CIFAR-100.

### A.2 Implementation details

For CIFAR-100, the batch size is set to 128 and the maximum training epoch is set to 200. We use the stochastic gradient descent (SGD) with a momentum of 0.9 and an initial learning rate of 0.1, and the learning rate decreases by an order of magnitude after 75, 130, and 180 epochs. The L2 regularization is used with a fixed constant of  $5 \times 10^{-4}$ .

For ImageNet, the batch size is set to 256 and the maximum training epoch is set to 90. We use the SGD with a momentum of 0.9 and an initial learning

rate of 0.1, and the learning rate decreases by an order of magnitude after 30 and 60 epochs. The L2 regularization is used with a fixed constant of  $1 \times 10^{-4}$ .

The temperature ( $T$ ) is set to 1 for classification losses and 3 for distillation losses.

All experiments are performed using Pytorch with NVIDIA RTX 8000 graphics processing units (GPUs).

### A.3 Ablation study

Figure 2 shows how the performance changes with respect to the values of the hyper-parameters. Since  $\alpha$  and  $\beta$  are set according to the typical setting used in other works [4, 5, 9], we vary the importance coefficient ( $\lambda$ ) and balancing constant ( $\gamma$ ). The red circle indicates the case reported in our paper. The performance remains similarly satisfactory.

### A.4 Experiments

We show additional experimental results for Section 3 and Section 6.

Table 1 shows the test accuracy of each main network for various combinations of exit structures and training methods. When our BEED is used, the proposed bottleneck exit structure outperforms the other exit structures even for MobileNet-V2 and EfficientNetB0, as mentioned in Section 3.

Table 2 shows the test accuracy of all classifiers (i.e., all exits, main network, and ensemble classifier) for different training methods. When the ensemble classification performance is compared, our method outperforms both CE and KD, as mentioned in Section 6.2. In addition, our method shows improved performance not only with the main network but also with the exits.

## References

1. He, K., Zhang, X., Ren, S., Sun, J.: Deep residual learning for image recognition. In: Proceedings of the IEEE/CVF Conference on Computer Vision and Pattern Recognition (CVPR). pp. 770–778. Las Vegas, Nevada (2016)
2. Huang, G., Chen, D., Li, T., Wu, F., v. d. Maaten, L., Weinberger, K.Q.: Multi-scale dense networks for resource efficient image classification. In: Proceedings of the International Conference on Learning Representations (ICLR) (2018)
3. Ji, M., Shin, S., Hwang, S., Park, G., Moon, I.C.: Refine myself by teaching myself: Feature refinement via self-knowledge distillation. In: Proceedings of the IEEE/CVF Conference on Computer Vision and Pattern Recognition (CVPR). pp. 10659–10668 (2021)
4. Li, H., Zhang, H., Qi, X., Ruigang, Y., Huang, G.: Improved techniques for training adaptive deep networks. In: Proceedings of the IEEE/CVF International Conference on Computer Vision (ICCV). pp. 1891–1900 (2019)
5. Phuong, M., Lampert, C.: Distillation-based training for multi-exit architectures. In: Proceedings of the IEEE/CVF International Conference on Computer Vision (ICCV). pp. 1355–1364 (2019)

6. Sandler, M., Howard, A., Zhu, M., Zhmoginov, A., Chen, L.C.: MobileNetV2: Inverted residuals and linear bottlenecks. In: Proceedings of the IEEE/CVF Conference on Computer Vision and Pattern Recognition (CVPR). pp. 4510–4520 (2018)
7. Tan, M., Le, Q.: EfficientNet: Rethinking model scaling for convolutional neural networks. In: Proceedings of the International Conference on Machine Learning (ICML). vol. 97, pp. 6105–6114 (2019)
8. Zagoruyko, S., Komodakis, N.: Wide residual networks. In: Proceedings of the British Machine Vision Conference (BMVC) (2016)
9. Zhang, L., Song, J., Gao, A., Chen, J., Bao, C., Ma, K.: Be your own teacher: Improve the performance of convolutional neural networks via self distillation. In: Proceedings of the IEEE/CVF International Conference on Computer Vision (ICCV). pp. 3712–3721 (2019)

| ResNet18     |         |        |        | Exit1            |         |        |        | Exit2            |         |        |        | Exit3            |         |        |        |
|--------------|---------|--------|--------|------------------|---------|--------|--------|------------------|---------|--------|--------|------------------|---------|--------|--------|
| Operator     | Channel | Repeat | Stride | Operator         | Channel | Repeat | Stride | Operator         | Channel | Repeat | Stride | Operator         | Channel | Repeat | Stride |
| Conv2d       | 64      | 1      | 1      | Bottleneck Block | 128     | 1      | 2      | Bottleneck Block | 256     | 1      | 2      | Bottleneck Block | 512     | 1      | 2      |
| ResNet Block | 64      | 2      | 1      | Bottleneck Block | 256     | 1      | 2      | Bottleneck Block | 512     | 1      | 2      | Avgpool 4x4      | -       | -      | -      |
| ResNet Block | 128     | 2      | 2      | Bottleneck Block | 512     | 1      | 2      | Avgpool 4x4      | -       | -      | -      | FC layer         | -       | -      | -      |
| ResNet Block | 256     | 2      | 2      | Avgpool 4x4      | -       | -      | -      | FC layer         | -       | -      | -      | -                | -       | -      | -      |
| ResNet Block | 512     | 2      | 2      | FC layer         | -       | -      | -      | -                | -       | -      | -      | -                | -       | -      | -      |
| Avgpool 4x4  | -       | -      | -      | -                | -       | -      | -      | -                | -       | -      | -      | -                | -       | -      | -      |
| FC layer     | -       | -      | -      | -                | -       | -      | -      | -                | -       | -      | -      | -                | -       | -      | -      |

---

| ResNet34     |         |        |        | Exit1            |         |        |        | Exit2            |         |        |        | Exit3            |         |        |        |
|--------------|---------|--------|--------|------------------|---------|--------|--------|------------------|---------|--------|--------|------------------|---------|--------|--------|
| Operator     | Channel | Repeat | Stride | Operator         | Channel | Repeat | Stride | Operator         | Channel | Repeat | Stride | Operator         | Channel | Repeat | Stride |
| Conv2d       | 64      | 1      | 1      | Bottleneck Block | 128     | 1      | 2      | Bottleneck Block | 256     | 1      | 2      | Bottleneck Block | 512     | 1      | 2      |
| ResNet Block | 64      | 3      | 1      | Bottleneck Block | 256     | 1      | 2      | Bottleneck Block | 512     | 1      | 2      | Avgpool 4x4      | -       | -      | -      |
| ResNet Block | 128     | 4      | 2      | Bottleneck Block | 512     | 1      | 2      | Avgpool 4x4      | -       | -      | -      | FC layer         | -       | -      | -      |
| ResNet Block | 256     | 6      | 2      | Avgpool 4x4      | -       | -      | -      | FC layer         | -       | -      | -      | -                | -       | -      | -      |
| ResNet Block | 512     | 3      | 2      | FC layer         | -       | -      | -      | -                | -       | -      | -      | -                | -       | -      | -      |
| Avgpool 4x4  | -       | -      | -      | -                | -       | -      | -      | -                | -       | -      | -      | -                | -       | -      | -      |
| FC layer     | -       | -      | -      | -                | -       | -      | -      | -                | -       | -      | -      | -                | -       | -      | -      |

---

| WRN16-4     |         |        |        |           | Exit1            |         |        |        | Exit2            |         |        |        |
|-------------|---------|--------|--------|-----------|------------------|---------|--------|--------|------------------|---------|--------|--------|
| Operator    | Channel | Repeat | Stride | Expansion | Operator         | Channel | Repeat | Stride | Operator         | Channel | Repeat | Stride |
| Conv2d      | 16      | 1      | 1      | -         | Bottleneck Block | 128     | 1      | 2      | Bottleneck Block | 256     | 1      | 2      |
| WRN Block   | 16      | 2      | 1      | 4         | Bottleneck Block | 256     | 1      | 2      | Avgpool 8x8      | -       | -      | -      |
| WRN Block   | 32      | 2      | 2      | 4         | Avgpool 8x8      | -       | -      | -      | FC layer         | -       | -      | -      |
| WRN Block   | 64      | 2      | 2      | 4         | FC layer         | -       | -      | -      | -                | -       | -      | -      |
| Avgpool 8x8 | -       | -      | -      | -         | -                | -       | -      | -      | -                | -       | -      | -      |
| FC layer    | -       | -      | -      | -         | -                | -       | -      | -      | -                | -       | -      | -      |

---

| WRN28-4     |         |        |        |           | Exit1            |         |        |        | Exit2            |         |        |        |
|-------------|---------|--------|--------|-----------|------------------|---------|--------|--------|------------------|---------|--------|--------|
| Operator    | Channel | Repeat | Stride | Expansion | Operator         | Channel | Repeat | Stride | Operator         | Channel | Repeat | Stride |
| Conv2d      | 16      | 1      | 1      | -         | Bottleneck Block | 128     | 1      | 2      | Bottleneck Block | 256     | 1      | 2      |
| WRN Block   | 16      | 4      | 1      | 4         | Bottleneck Block | 256     | 1      | 2      | Avgpool 8x8      | -       | -      | -      |
| WRN Block   | 32      | 4      | 2      | 4         | Avgpool 8x8      | -       | -      | -      | FC layer         | -       | -      | -      |
| WRN Block   | 64      | 4      | 2      | 4         | FC layer         | -       | -      | -      | -                | -       | -      | -      |
| Avgpool 8x8 | -       | -      | -      | -         | -                | -       | -      | -      | -                | -       | -      | -      |
| FC layer    | -       | -      | -      | -         | -                | -       | -      | -      | -                | -       | -      | -      |

---

| MobileNet-V2    |         |        |        |           | Exit1            |         |        |        | Exit2            |         |        |        | Exit3            |         |        |        |
|-----------------|---------|--------|--------|-----------|------------------|---------|--------|--------|------------------|---------|--------|--------|------------------|---------|--------|--------|
| Operator        | Channel | Repeat | Stride | Expansion | Operator         | Channel | Repeat | Stride | Operator         | Channel | Repeat | Stride | Operator         | Channel | Repeat | Stride |
| Conv2d          | 32      | 1      | 1      | -         | Bottleneck Block | 144     | 1      | 2      | Bottleneck Block | 192     | 1      | 2      | Bottleneck Block | 320     | 1      | 2      |
| MobileNet Block | 16      | 1      | 1      | 1         | Bottleneck Block | 192     | 1      | 2      | Bottleneck Block | 320     | 1      | 2      | Avgpool 4x4      | -       | -      | -      |
| MobileNet Block | 24      | 2      | 1      | 6         | Bottleneck Block | 320     | 1      | 2      | Avgpool 4x4      | -       | -      | -      | FC layer         | -       | -      | -      |
| MobileNet Block | 32      | 3      | 2      | 6         | Avgpool 4x4      | -       | -      | -      | FC layer         | -       | -      | -      | -                | -       | -      | -      |
| MobileNet Block | 64      | 4      | 2      | 6         | FC layer         | -       | -      | -      | -                | -       | -      | -      | -                | -       | -      | -      |
| MobileNet Block | 96      | 3      | 1      | 6         | -                | -       | -      | -      | -                | -       | -      | -      | -                | -       | -      | -      |
| MobileNet Block | 160     | 3      | 2      | 6         | -                | -       | -      | -      | -                | -       | -      | -      | -                | -       | -      | -      |
| MobileNet Block | 320     | 1      | 1      | 6         | -                | -       | -      | -      | -                | -       | -      | -      | -                | -       | -      | -      |
| Conv2d 1x1      | 1280    | 1      | 1      | -         | -                | -       | -      | -      | -                | -       | -      | -      | -                | -       | -      | -      |
| Avgpool 4x4     | -       | -      | -      | -         | -                | -       | -      | -      | -                | -       | -      | -      | -                | -       | -      | -      |
| FC layer        | -       | -      | -      | -         | -                | -       | -      | -      | -                | -       | -      | -      | -                | -       | -      | -      |

---

| EfficientNetB0     |         |        |        |           | Exit1            |         |        |        | Exit2            |         |        |        | Exit3            |         |        |        |
|--------------------|---------|--------|--------|-----------|------------------|---------|--------|--------|------------------|---------|--------|--------|------------------|---------|--------|--------|
| Operator           | Channel | Repeat | Stride | Expansion | Operator         | Channel | Repeat | Stride | Operator         | Channel | Repeat | Stride | Operator         | Channel | Repeat | Stride |
| Conv2d             | 32      | 1      | 1      | -         | Bottleneck Block | 144     | 1      | 2      | Bottleneck Block | 240     | 1      | 2      | Bottleneck Block | 320     | 1      | 2      |
| EfficientNet Block | 16      | 1      | 1      | 1         | Bottleneck Block | 240     | 1      | 2      | Bottleneck Block | 320     | 1      | 2      | Avgpool 4x4      | -       | -      | -      |
| EfficientNet Block | 24      | 2      | 1      | 6         | Bottleneck Block | 320     | 1      | 2      | Avgpool 4x4      | -       | -      | -      | FC layer         | -       | -      | -      |
| EfficientNet Block | 60      | 2      | 2      | 6         | Avgpool 4x4      | -       | -      | -      | FC layer         | -       | -      | -      | -                | -       | -      | -      |
| EfficientNet Block | 80      | 3      | 2      | 6         | FC layer         | -       | -      | -      | -                | -       | -      | -      | -                | -       | -      | -      |
| EfficientNet Block | 112     | 3      | 1      | 6         | -                | -       | -      | -      | -                | -       | -      | -      | -                | -       | -      | -      |
| EfficientNet Block | 192     | 4      | 2      | 6         | -                | -       | -      | -      | -                | -       | -      | -      | -                | -       | -      | -      |
| EfficientNet Block | 320     | 1      | 1      | 6         | -                | -       | -      | -      | -                | -       | -      | -      | -                | -       | -      | -      |
| Avgpool 4x4        | -       | -      | -      | -         | -                | -       | -      | -      | -                | -       | -      | -      | -                | -       | -      | -      |
| FC layer           | -       | -      | -      | -         | -                | -       | -      | -      | -                | -       | -      | -      | -                | -       | -      | -      |

Fig. 1. Description of the main networks and exits for CIFAR-100. The lines in the main network structure correspond to the locations where the exits are attached.

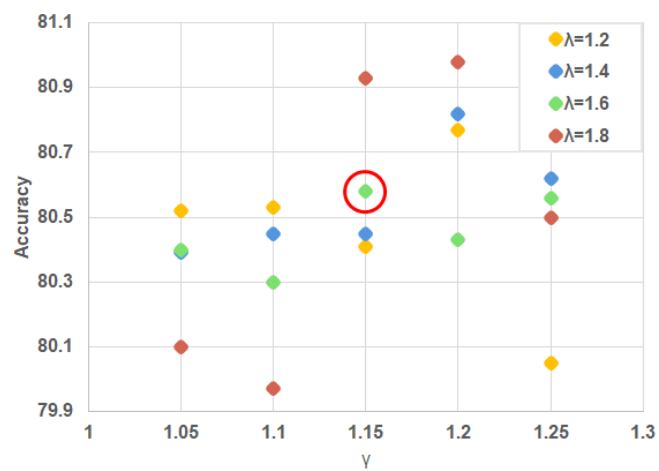

**Fig. 2.** Test accuracy (%) of ResNet18 trained for CIFAR-100 with varying hyper-parameters.

**Table 1.** Test accuracy (%) of the main network trained by different training methods with different exit structures for CIFAR-100. The best results are marked in bold. The column ‘CE’ corresponds to Table 1 of the main paper.

| Network        | Exit structure      | CE           | KD           | EED          | BEED         |
|----------------|---------------------|--------------|--------------|--------------|--------------|
| ResNet18       | LCT                 | 78.22        | 78.17        | 78.81        | 78.95        |
|                | BYOT                | 78.51        | 78.47        | 78.38        | 79.23        |
|                | TOFD                | 79.01        | 78.97        | 79.61        | 80.43        |
|                | Proposed bottleneck | <b>79.39</b> | <b>79.21</b> | <b>80.03</b> | <b>80.58</b> |
| ResNet34       | LCT                 | 79.80        | 79.40        | 80.65        | 81.07        |
|                | BYOT                | 79.41        | 79.40        | 79.98        | 80.60        |
|                | TOFD                | 79.92        | 79.65        | 81.16        | 81.17        |
|                | Proposed bottleneck | <b>80.22</b> | <b>80.17</b> | <b>81.61</b> | <b>81.62</b> |
| WRN16-4        | LCT                 | 75.71        | 75.92        | 75.66        | 75.62        |
|                | BYOT                | 76.61        | 76.30        | 75.58        | 75.75        |
|                | TOFD                | 76.81        | 77.11        | 77.06        | 76.96        |
|                | Proposed bottleneck | <b>77.49</b> | <b>77.75</b> | <b>78.26</b> | <b>78.51</b> |
| WRN28-4        | LCT                 | 78.19        | 77.81        | 77.84        | 77.51        |
|                | BYOT                | 78.56        | 78.58        | 77.77        | 78.48        |
|                | TOFD                | 79.02        | 78.89        | 78.63        | 79.25        |
|                | Proposed bottleneck | <b>80.05</b> | <b>80.06</b> | <b>80.55</b> | <b>80.93</b> |
| MobileNet-V2   | LCT                 | <b>74.31</b> | 73.98        | 76.49        | 76.23        |
|                | BYOT                | 74.10        | <b>74.04</b> | 75.32        | 75.91        |
|                | TOFD                | 73.51        | 73.61        | 76.61        | 76.47        |
|                | Proposed bottleneck | 73.73        | 73.68        | <b>76.63</b> | <b>76.74</b> |
| EfficientNetB0 | LCT                 | <b>75.01</b> | 74.90        | 77.21        | 77.22        |
|                | BYOT                | 74.51        | <b>75.02</b> | 75.39        | 76.63        |
|                | TOFD                | 74.38        | 74.77        | 77.28        | 77.07        |
|                | Proposed bottleneck | 74.21        | 74.44        | <b>77.69</b> | <b>77.62</b> |

**Table 2.** Test accuracy (%) of the main network, exits, and ensemble for CIFAR-100. The best results are marked in bold.

| Network        | Method   | Exit1        | Exit2        | Exit3        | Main         | Ens.         |
|----------------|----------|--------------|--------------|--------------|--------------|--------------|
| ResNet18       | Baseline | -            | -            | -            | 77.60        | -            |
|                | CE       | 74.44        | 76.68        | 78.48        | 79.39        | 80.68        |
|                | KD       | 75.16        | 77.45        | 78.81        | 79.21        | 80.93        |
|                | EED      | 77.38        | 79.00        | 79.93        | 80.03        | 81.00        |
|                | BEED     | <b>77.55</b> | <b>79.42</b> | <b>80.33</b> | <b>80.58</b> | <b>81.45</b> |
| ResNet34       | Baseline | -            | -            | -            | 77.96        | -            |
|                | CE       | 75.04        | 78.25        | 79.72        | 80.22        | 81.70        |
|                | KD       | 75.49        | 79.15        | 80.05        | 80.17        | 81.89        |
|                | EED      | 77.67        | 80.14        | 81.38        | 81.61        | 82.45        |
|                | BEED     | <b>77.93</b> | <b>80.19</b> | <b>81.43</b> | <b>81.62</b> | <b>82.50</b> |
| WRN16-4        | Baseline | -            | -            | -            | 76.38        | -            |
|                | CE       | 70.23        | 74.71        | -            | 77.49        | 78.47        |
|                | KD       | 71.28        | 75.67        | -            | 77.75        | 78.41        |
|                | EED      | 74.24        | 76.92        | -            | 78.26        | 78.36        |
|                | BEED     | <b>74.71</b> | <b>77.00</b> | -            | <b>78.51</b> | <b>78.69</b> |
| WRN28-4        | Baseline | -            | -            | -            | 78.64        | -            |
|                | CE       | 73.33        | 77.64        | -            | 80.05        | 81.17        |
|                | KD       | 74.28        | 78.58        | -            | 80.06        | 81.13        |
|                | EED      | 76.29        | 79.25        | -            | 80.55        | 80.49        |
|                | BEED     | <b>76.77</b> | <b>79.55</b> | -            | <b>80.93</b> | <b>81.18</b> |
| MobileNet-V2   | Baseline | -            | -            | -            | 71.87        | -            |
|                | CE       | 72.65        | 74.37        | 76.20        | 73.73        | 78.21        |
|                | KD       | 73.82        | 75.09        | 76.29        | 73.68        | 78.36        |
|                | EED      | 75.71        | 76.58        | 77.43        | 76.63        | 78.69        |
|                | BEED     | <b>75.76</b> | <b>76.87</b> | <b>77.47</b> | <b>76.74</b> | <b>78.86</b> |
| EfficientNetB0 | Baseline | -            | -            | -            | 71.79        | -            |
|                | CE       | 73.88        | 75.35        | 77.51        | 74.21        | 79.30        |
|                | KD       | 73.89        | 75.41        | 76.62        | 74.44        | 78.96        |
|                | EED      | <b>76.13</b> | 76.72        | 77.94        | 77.47        | <b>79.38</b> |
|                | BEED     | 76.12        | <b>77.23</b> | <b>78.01</b> | <b>77.62</b> | 79.36        |
